# Supplementary material for: Dynamic Evolution of Traveler’s Bounded-Rational Route Choice Behavior
Source: Hindawi journal article supplement (doi:10.1155/2018/4378364), 2018-12-04
Supplement: f1 [file 4378364.f1.xlsx]

## Sheet: 20181028
basic scene	q	a	Δ	θ
	1000	0.3	0.2	0.2
1	a=0.3	basic scene
	equlilibrium rounds	929
	route	r1	r2	r3	r4	r5
	volume	167	192	265	174	202
							q=1000, α=0.3, θ =0.2
1①	Δ=0.1							equlilibrium rounds	route1	route2	route3	route4	route5
	equlilibrium rounds	950					Δ=0.1	950	165	191	259	178	207
	route	r1	r2	r3	r4	r5	Δ=0.2	937	169	194	257	176	204
	volume	165	191	259	178	207	Δ=0.3	905	163	187	274	169	207
							Δ=0.4	897	162	186	277	169	206
	Δ=0.2						Δ=0.5	886	161	184	274	177	204
	equlilibrium rounds	937					Δ=0.6	868	167	181	260	174	218
	route	r1	r2	r3	r4	r5	Δ=0.7	854	157	180	279	163	221
	volume	169	194	257	176	204
	Δ=0.3
	equlilibrium rounds	905
	route	r1	r2	r3	r4	r5
	volume	163	187	274	169	207
	Δ=0.4
	equlilibrium rounds	897
	route	r1	r2	r3	r4	r5
	volume	162	186	277	169	206
	Δ=0.5
	equlilibrium rounds	886
	route	r1	r2	r3	r4	r5
	volume	161	184	274	177	204
	Δ=0.6
	equlilibrium rounds	868
	route	r1	r2	r3	r4	r5
	volume	167	181	260	174	218
	Δ=0.7
	equlilibrium rounds
	route	r1	r2	r3	r4	r5
	volume	157	180	279	163	221
1②
	σ=0.02							q=1000 , α=0.3, θ =0.2, Δ ~ N(0.2 ,σ1 )
	equlilibrium rounds	935							equlilibrium rounds	route1	route2	route3	route4	route5
	route	r1	r2	r3	r4	r5		σ1=0.02	935	172	227	208	180	213
	volume	172	227	208	180	213		σ1=0.03	925	168	193	219	216	204
								σ1=0.04	916	166	190	236	207	201
	σ=0.03							σ1=0.05	922	176	203	213	190	218
	equlilibrium rounds	925						σ1=0.06	913	173	216	222	180	209
	route	r1	r2	r3	r4	r5		σ1=0.07	908	196	200	211	182	211
	volume	168	193	219	216	204		σ1=0.08	916	175	219	212	182	212
	σ=0.04
	equlilibrium rounds	916
	route	r1	r2	r3	r4	r5
	volume	166	190	236	207	201
	σ=0.05
	equlilibrium rounds	922
	route	r1	r2	r3	r4	r5
	volume	176	203	213	190	218
	σ=0.06
	equlilibrium rounds	913
	route	r1	r2	r3	r4	r5
	volume	173	216	222	180	209
	σ=0.07
	equlilibrium rounds	908
	route	r1	r2	r3	r4	r5
	volume	196	200	211	182	211
	σ=0.08
	equlilibrium rounds	916
	route	r1	r2	r3	r4	r5
	volume	175	219	212	182	212
								q=1000 , α=0.3, θ =0.2, Δ ~ N(u1,0.05)
1③									equlilibrium rounds	route1	route2	route3	route4	route5
	u=0.1							u1=0.1	1038	178	204	216	186	216
	equlilibrium rounds	1038						u1=0.2	922	176	203	213	190	218
	route	r1	r2	r3	r4	r5		u1=0.3	886	176	202	212	197	213
	volume	178	204	216	186	216		u1=0.4	885	173	197	218	204	208
								u1=0.5	865	169	205	205	200	221
	u=0.2
	equlilibrium rounds	922
	route	r1	r2	r3	r4	r5
	volume	176	203	213	190	218
	u=0.3
	equlilibrium rounds	886
	route	r1	r2	r3	r4	r5
	volume	176	202	212	197	213
	u=0.4
	equlilibrium rounds	885
	route	r1	r2	r3	r4	r5
	volume	173	197	218	204	208
	u=0.5
	equlilibrium rounds	865
	route	r1	r2	r3	r4	r5
	volume	169	205	205	200	221
2①	Δ=0.5
	a=0.3
	equlilibrium rounds	896						q=1000 , θ =0.2
	route	r1	r2	r3	r4	r5			equlilibrium days	route1	route2	route3	route4	route5
	volume	163	187	284	169	197		Δ=0.5，a=0.3	896	163	187	284	169	197
								Δ=0.5，a=0.5	915	167	192	265	174	202
	a=0.5	915						Δ=0.5，a=0.8	971	178	204	216	186	216
	equlilibrium rounds							Δ=0.2，a=0.3	929	167	192	265	174	202
	route	r1	r2	r3	r4	r5		Δ=0.2，a=0.5	965	173	198	239	180	210
	volume	167	192	265	174	202		Δ=0.2，a=0.8	977	177	203	220	185	215
	a=0.8
	equlilibrium rounds	971
	route	r1	r2	r3	r4	r5
	volume	178	204	216	186	216
2②	Δ=0.2
	a=0.3	basic scene
	equlilibrium rounds	929
	route	r1	r2	r3	r4	r5
	volume	167	192	265	174	202
	a=0.5
	equlilibrium rounds	965
	route	r1	r2	r3	r4	r5
	volume	173	198	239	180	210
	a=0.8
	equlilibrium rounds	977
	route	r1	r2	r3	r4	r5
	volume	177	203	220	185	215
3①	θ=0.2	basic scene						q=1000 , α=0.3, Δ =0.2
	equlilibrium rounds	929							equlilibrium rounds	route1	route2	route3	route4	route5
	route	r1	r2	r3	r4	r5		θ=0.1	950	170	195	250	178	207
	volume	167	192	265	174	202		θ=0.2	929	167	192	265	174	202
								θ=0.3	917	165	190	271	173	201
	θ=0.4							θ=0.4	889	161	184	272	168	205
	equlilibrium rounds	889						θ=0.5	867	167	190	268	174	201
	route	r1	r2	r3	r4	r5
	volume	161	184	272	168	205
	θ=0.5
	equlilibrium rounds	867
	route	r1	r2	r3	r4	r5
	volume	167	190	268	174	201
3②
	σ=0.02
	equlilibrium rounds	1612
	route	r1	r2	r3	r4	r5
	volume	176	202	223	184	215
	σ=0.08
	equlilibrium rounds	991
	route	r1	r2	r3	r4	r5
	volume	166	227	201	173	233
3③
	u=0.3
	equlilibrium rounds	1524
	route	r1	r2	r3	r4	r5
	volume	240	189	199	172	200
	u=0.4
	equlilibrium rounds	1236
	route	r1	r2	r3	r4	r5
	volume	171	237	207	178	207
	u=0.6
	equlilibrium rounds	1216
	route	r1	r2	r3	r4	r5
	volume	168	192	241	175	224
